1 **Genotype of Human Papilloma virus in Male**  
2 **Genital Warts In Korean Men and Review of**  
3 **Literature**

4  
5 Woochul Moon<sup>1</sup>, Jungho Jo<sup>2</sup>, Jinhan Yoon<sup>2</sup>,  
6 Korean Male HPV Study Group, Jung Joo  
7 Moon<sup>1</sup>

8 1 Goodgene Inc., Seoul, Korea and  
9 Cellgenemedix Coop, Houston, TX, USA

10 2 Department of Urology, Dong-A University,  
11 Pusan Korea

12  
13 **Correspondence:**

14 1 Jung Joo Moon, Goodgene Inc., 28 Digital-ro  
15 30-gil #1111 Guro-gu, Seoul, Republic of Korea  
16 (08389)

17 1 Cellgenemedix LLC, Houston, TX / 243  
18 Broadway #9188 SMB# 9564, Newark, New  
19 Jersey, 07104, USA

20 2 Department of Urology, Dong-A university,  
21 Busan Korea.

22 TEL: +1-713-904-0106 FAX: +82-2-3409-  
23 1330/+1-516-953-3453

24 E mail address: [jung.moon.md@gmail.com](mailto:jung.moon.md@gmail.com)

25  
26 **Abbreviations and Acronyms:**

27 HPV = human papillomavirus

28 DNA microarray = DNA chip

29 IARC = International Agency for Research on

30 Cancer

31 PCR = polymerase chain reaction

32 EGLs=External genital lesions

33 CA=Condyloma acuminatum

34 MSM=Men who have sex with men

35  
36 **ABSTRACT**

37  
38 Purpose: Genital warts are one of the most  
39 common sexually transmitted infections and are  
40 known to develop due to human papillomavirus  
41 (HPV) infection, especially HPV types 6 and 11.  
42 However, their prevalence and subtypes in male  
43 genital warts remains poorly defined. HPV  
44 vaccine is administered to men in part to prevent  
45 anogenital warts and it is important to  
46 investigate their expected impact in male  
47 anogenital warts.

48 Materials and Methods: We have herein  
49 conducted a multicenter, prospective study to  
50 analyze HPV type distribution in genital warts of  
51 1000 Korean men by using DNA microarray that  
52 can detect 40 types of genital HPV.

53 Results: 1000 out of 1015 genital warts showed  
54 HPV DNA. Out of 1000 HPV-positive samples,  
55 18.8% showed mixed infection and 81.2%  
56 showed single infection. Of 18 high-risk (16.2%)

57 and 14 low-risk (94.3%) HPV types detected, the  
58 most common type of HPV types were HPV6  
59 (59.5%), followed by HPV11 (24.3%), HPV16  
60 (5.8%), HPV91 (5.3%), HPV40 (3.3%). 85.9%  
61 showed the 9 HPV types covered by the vaccine.  
62 Sixteen of the 200 HPV specimens submitted for  
63 sequencing showed discrepant results  
64 compared to the DNA sequencing.  
65 Conclusions: Male genital warts predominantly  
66 show low-risk type HPV (HPV 6 and 11).  
67 However, high-risk HPV is not uncommon and  
68 the role of high-risk HPV in genital warts may be  
69 considered. The Gardasil 9 HPV vaccine is  
70 expected to provide protection against about  
71 >80% of male genital warts. Further HPV typing  
72 studies in male genital warts are necessary in  
73 other races and geographical areas to define the  
74 role and management of high-risk type HPV in  
75 male genital warts.

76  
77 **Key Words:** male genital warts, human  
78 papillomavirus (HPV), genotype, vaccine,  
79 Gardasil 9

## 80 INTRODUCTION

81  
82  
83 Human papillomaviruses (HPVs) are a group  
84 of small double-stranded DNA viruses that infect

85 the human epithelium, causing hyperproliferation,  
86 and one of the most common sexually  
87 transmitted infections worldwide.<sup>1</sup> There are  
88 over 200 types of HPV, of which approximately  
89 45 types infect epithelial and mucosal lining of  
90 the anogenital area, which is called genital or  
91 anogenital HPV.<sup>2</sup> HPV types are organized into  
92 five major genera: alpha, beta, gamma, mu, and  
93 nu, and HPV infections are divided into  
94 cutaneous and mucosal HPV.<sup>2</sup> Cutaneous HPV  
95 causes common warts and mucosal HPV  
96 causes anogenital infections and lesions.  
97 Mucosal HPV induces a variety of external  
98 genital lesions, including warts (condylomata  
99 acuminata), precancerous lesions, and cancer,  
100 and is classified as high-risk or low-risk  
101 depending on its oncogenic potential.<sup>2</sup> Nearly  
102 100% of uterine cervix cancer, 36%–40 % vulvar  
103 cancer, close to 90 % of vaginal cancers in  
104 females and 80%–85% of anal cancers and  
105 close to 50% of penile cancers in males, and  
106 20%–30% of head and neck cancers develop  
107 secondary to HPV infection.<sup>3</sup> Cervical cancer is  
108 the second most common cancer affecting  
109 women.<sup>1</sup> With the appreciation of the role of  
110 HPV in cervical carcinogenesis, HPV detection  
111 and genotyping has become a standard

112 screening tool for cervical cancer in combination  
113 with cytology studies.<sup>4</sup>  
114 Quadrivalent HPV vaccine (Types 6, 11, 16,  
115 and 18; Gardasil; Merck, Sharp & Dohme  
116 Corp) was approved by the FDA (U.S. Food and  
117 Drug Administration) on June 8, 2006 for  
118 females 9-26 years of age to protect against  
119 cervical, vulvar and vaginal cancers and genital  
120 warts.<sup>5,6,7</sup> Later, it was approved in both men  
121 and women 9 through 26 years of age for the  
122 prevention of genital warts and anal cancers.<sup>6</sup>  
123 On December 10, 2014, the FDA approved  
124 Gardasil 9, which covers the same four HPV  
125 types as Gardasil, as well as an additional five  
126 HPV types (6, 11, 16, 18, 31, 33, 45, 52, and 58),  
127 for use in males and females aged 9 through 26  
128 years and eventually quadrivalent Gardasil  
129 vaccine was discontinued.<sup>5,7</sup> On October 5,  
130 2018, FDA expanded the approved use of the  
131 Gardasil 9 vaccine to include women and men  
132 aged 27 through 45 years.<sup>7</sup> HPV vaccination  
133 prior to becoming infected with the HPV types  
134 covered by the vaccine has the potential to  
135 prevent more than 90 percent of effected  
136 cancers, or 31,200 cases every year, from ever  
137 developing.<sup>7</sup>  
138 Risk factors associated with persistence of  
139 HPV infection include older age, cigarette

140 smoking or other tobacco use,  
141 immunocompromised status (including HIV),  
142 nutritional deficiencies, non-use of condoms,  
143 presence of other STDs, oral contraceptive use,  
144 uncircumcised status among men, and human  
145 leukocyte antigen (HLA) polymorphisms.<sup>9</sup>  
146 Although less appreciated, the burden of  
147 HPV in men is also significant and needs to be  
148 evaluated. HPV induces anal, penile, and head  
149 and neck cancers in men.<sup>4,10,12-13</sup> Most studies  
150 examining the role of HPV in the development of  
151 male external genital lesions (EGLs) have  
152 identified mucosal HPV.<sup>10-13</sup> High- and low-risk  
153 HPV types are found in 15.6% and 73.2% of  
154 EGLs, HPV 6 or 11 in condylomas, HPV 16 in  
155 PEIN (penile intraepithelial neoplasia) I or II  
156 lesion and 1 PeIN III lesion positive for HPV 6  
157 only in a study by DJ Ingles et al., while 70%  
158 and 100% of PEINs are HPV-positive, and  
159 40 %–50% of invasive penile cancers are HPV  
160 positive in a study by Dillner et al.<sup>11</sup>  
161 The major HPV-related diseases in men are  
162 genital warts. The majority of genital warts  
163 develop due to infection by low-risk HPVs.<sup>12-14</sup>  
164 While HPV-related condyloma is considered a  
165 benign lesion, the substantial economic and  
166 psychosocial burden of this clinical manifestation  
167 of infection cannot be overlooked. HPV type 6

168 and 11 have been reported to cause more than  
169 90% of genital warts.<sup>12-14</sup>

170 However, contrary to the common belief that  
171 HPV 6 and HPV 11 induce almost all genital  
172 warts in males, and that vaccines targeting HPV  
173 6 and HPV11 will provide protection against  
174 most of them, data on genotyping information of  
175 male genital warts are scarce.<sup>4, 16-18</sup> There have  
176 been suggestions that at least some genital  
177 warts, in addition to HPV6 and HPV11, also  
178 contained co-infection with high-risk HPVs.<sup>17, 18</sup>  
179 Epidemiological studies indicate that the 9vHPV  
180 vaccine could prevent approximately 90% of  
181 cervical cancers, 70 %–85% of high-grade  
182 cervical dysplasia (precancers), 85 %–95% of  
183 HPV-related vulvar, vaginal, and anal cancers,  
184 and 90% of genital warts in women.<sup>19</sup> Therefore,  
185 to review the effect of Gardasil 9 in the male  
186 population, it is pertinent to identify the  
187 prevalence of these nine HPV types in  
188 anogenital warts in men. Moreover, monitoring  
189 the impact of vaccination on HPV infection and  
190 disease in men raises challenges such as the  
191 long time frame until cancer outcomes and  
192 complexity of factors that need consideration  
193 (different policies, health system outcomes, and  
194 biological outcomes), as well as the fact that  
195 genital specimens suitable for monitoring HPV

196 prevalence are not routinely collected for other  
197 diagnostic or screening purposes in males<sup>20</sup>.

198 GG HPV DNA microarray (HPV40 DNA chip)  
199 is an oligonucleotide microarray that can detect  
200 40 types of genital HPV in an accurate, high-  
201 throughput, and cost-effective way.<sup>21</sup> We herein  
202 have carried out a large-scale genotyping study  
203 in Korean men with genital warts by using HPV  
204 DNA chip. The purpose of the current study was  
205 to identify the precise genotyping information of  
206 HPV in male genital warts, specifically to  
207 investigate whether genital warts contain high-  
208 risk HPVs, how much proportion of genital warts  
209 contain low-and high-risk HPVs, and to predict  
210 the potential efficacy of currently available HPV  
211 vaccines in the protection of male genital warts.

## 212 **MATERIALS AND METHODS**

213  
214  
215 We investigated the genomic DNA of HPV from  
216 fresh tissues of pathologically diagnosed genital  
217 warts from 1015 Korean adult men using the GG  
218 HPV DNA chip. The GG HPV DNA chip  
219 (Goodgene Inc., Seoul, Korea) has multiple  
220 oligonucleotide probes for 40 types of genital  
221 HPV and human beta globin genes and  
222 identified 40 HPV types (HPV 6, 11, 16, 18, 26,  
223 30–35, 39, 40, 42–45, 51–56, 58, 59, 61, 62,

224 66–70, 72, 73, 81–84, 90, and 91). The HPV  
225 DNA chip has been licensed by the Korean FDA  
226 for genotyping of genital HPV and screening of  
227 precancerous lesions and cancer of the uterine  
228 cervix. It can detect 10–100 copies of HPV per  
229 sample. Genomic DNA extraction, amplification,  
230 labeling, hybridization, and analysis were  
231 performed according to the manufacturer’s  
232 instructions. Briefly, genomic DNA was extracted  
233 using the LaboPass™ Tissue mini prep. Kit  
234 (Cosmo Genetech Products, Seoul, Korea). The  
235 primers chosen were the L1 gene: primers L1  
236 and L3. PCR with the primers L1 and L3  
237 amplified approximately 200-base pair DNA  
238 fragments of all genotypes of HPV. A mixture of  
239 10 mL of HPV DNA-amplified product and 10 mL  
240 beta-globin-amplified products were denatured  
241 by heating at 95 °C for two min, followed by  
242 cooling for 3 min on ice. The samples were  
243 mixed with 65 mL of hybridization buffer  
244 (Goodgene, Seoul, Korea) and placed on the  
245 HPV DNA chip. The HPV DNA chip was  
246 incubated at 50 °C for 30 min. The HPV DNA  
247 chip was washed twice with 36 SSPE for 2 min  
248 and 16 SSPE for 2 min. This led to the formation  
249 of visible spots on the array surface, which were  
250 then scanned, measured, and analyzed using a  
251 dedicated reader and software after the chip

252 was dried (Molecular MDC Genepix 4000A  
253 Scanner, Molecular Devices Inc., California,  
254 USA). To confirm and validate the results of the  
255 HPV DNA chip analysis, they were  
256 comparatively analyzed by DNA sequencing  
257 assay in selected cases.

### 259 **Patient recruitment and sample collection**

260 With the appreciation of the importance of HPV  
261 in men, a group of urologists in Korea and  
262 molecular scientists established a “Korean Male  
263 HPV (KM-HPV) Study Group” in 2008, which  
264 aimed to study the prevalence and genotype of  
265 HPV infection and guide HPV vaccination in  
266 men. This study was carried out in this group. A  
267 total of 1050 patients were enrolled in the  
268 present study from 30 urologic clinics in Seoul  
269 and Busan, South Korea, over a 2-year period.  
270 Patients with a clinical diagnosis of genital warts  
271 were invited to participate in this study. In  
272 accordance with Korean regulations, because all  
273 patients presented through private urologic  
274 clinics and voluntarily signed informed consent,  
275 no ethics committee approval was necessary.  
276 This study complied with the Declaration of  
277 Helsinki, and written informed consent was  
278 obtained from each patient. Fresh tissue  
279 fragments of genital lesions consistent with

280 exophytic condylomata acuminata were  
281 removed by excision biopsy in a strictly sterile  
282 manner at the time of operative treatment. Then,  
283 they were immediately immersed in 3 ml of BD  
284 Universal Viral Transport Medium (BD  
285 Diagnostics, Franklin Lakes, NJ, USA) and sent  
286 to the laboratory and stored at 4<sup>0</sup> °C until  
287 processing. Slides of the specimen were made,  
288 stained with hematoxylin and eosin, and  
289 evaluated by pathologists for the presence of  
290 inflammatory, infectious, preneoplastic, or  
291 neoplastic conditions. Samples with coexisting  
292 neoplastic conditions, such as EIN or cancer,  
293 were excluded from this study.

### 295 **HPV detection and genotyping assay**

#### 297 **DNA extraction and PCR**

298 After receiving the samples, tissue fragments  
299 were fixed in formalin and embedded in paraffin.  
300 DNA was extracted from formalin-fixed, paraffin-  
301 embedded specimens using the QIAamp DNA  
302 FFPE Tissue Kit (Qiagen) according to the  
303 manufacturer's protocol. The sample DNA was  
304 obtained from tissue containing both epithelium  
305 and stroma, so the concentration of HPV in  
306 infected keratinocytes is likely to be higher.<sup>35</sup>

307 Genotyping was performed to detect HPV DNA  
308 using the GG HPV DNA chip, which detects 40  
309 HPV genotypes classified as high- or low-risk,  
310 depending on its association with the  
311 development of carcinoma (high-risk types: 16,  
312 18, 26, 31, 33, 35, 39, 45, 51, 52, 53, 56, 58, 59,  
313 66, 67, 68, 69, 73, and 82; low-risk types: 6, 11,  
314 30, 32, 34, 40, 42, 43, 44, 54, 55, 61, 62, 70, 72,  
315 81, 83, 84, 90, and 91). DNA was extracted  
316 using a commercial kit (QIAamp Mini Kit, Qiagen,  
317 Valencia, CA, USA) on a robotic system,  
318 according to the manufacturer's instructions.  
319 DNA was stored at -70<sup>0</sup> °C until use. HPV  
320 testing was undertaken first by PCR for  
321 amplification of a fragment of the L1 gene and  
322 human beta-actin, a housekeeping gene and  
323 reference gene.

324 DNA amplifications were performed using  
325 previously reported consensus primers. The  
326 sequence from 1024 to 1203 bp of the L1 gene  
327 (e.g HPV 16, GenBank No. K02718.1) was  
328 amplified using primer sets MY11 (5'-  
329 GCMCAGGGWCATAYAYAATGG-3') and GP6-  
330 1 (5'-AATAAACTGTAAAT CATATTCCTC-3').  
331 This region of HPV L1 is a highly conserved  
332 region despite integration of the HPV genome  
333 into the human genome and has been frequently  
334 analyzed in genotyping of HPV. The primer sets

335 ACTBF (5'-GCACCACACCTTCTACAATGA-3')  
336 and ACTBR (5'-GTCATCTTCTCGCGTTGGC-  
337 3') were designed to amplify the human beta-  
338 actin gene. The reaction mixture of 30  $\mu\text{l}$   
339 contained 7  $\mu\text{l}$  of DNA sample, 23  $\mu\text{l}$  of PCR  
340 buffer (Perkin-Elmer, Norwalk, CT, USA), 3.5  
341 mM MgCl<sub>2</sub>, 0.2 mM dNTP, 10 pmol of primer set  
342 of MY11/GP6-1, ACTBF/ACTBR, and 1 U of  
343 AmpliTaq polymerase (Perkin Elmer). The  
344 mixture was subjected to 40 cycles of  
345 amplification using a DNA thermal cycler 2720  
346 (Perkin Elmer). For duplex PCR of the HPV L1  
347 gene and human beta-actin gene, each cycle  
348 included a denaturation step at 95 °C for 30 s, an  
349 annealing step at 54 °C for 30 s, and a chain  
350 elongation step at 72 °C for 30 s. Each PCR was  
351 initiated with a 5-min denaturation step at 95 °C  
352 and finished by a 5-min extension step at 72 °C.  
353 To avoid false positives and false negatives, a  
354 negative control of reagent only (no template)  
355 and positive controls of recombinant plasmid  
356 carrying the L1 gene of HPV16 and HPV6 were  
357 included in each amplification reaction. PCR  
358 products were electrophoresed on 2% agarose  
359 gel (FMC Bioproducts, USA), stained with  
360 ethidium bromide, and photographed under UV  
361 light. PCR products of HPV L1 and human beta-

362 actin gene were detected as fragments of  
363 approximately 180 bp and 102 bp, respectively,  
364 by electrophoresis. Specimens that tested  
365 positive by human beta-actin PCR (internal  
366 control), hence with adequate specimen quality,  
367 were subjected to HPV DNA genotyping.  
368  
369 **HPV DNA microarray analysis**  
370 Sequences of the HPV L1 gene and human beta  
371 actin gene were amplified and labeled with Cy5.  
372 A mixture of 15  $\mu\text{L}$  of amplified product and 50  $\mu\text{L}$   
373 of distilled water was denatured by heating at  
374 95 °C for 3 min, followed by cooling for 5 min on  
375 ice. The samples were mixed with 65  $\mu\text{L}$  of GG  
376 hybridization buffer (Goodgene, Inc.) and then  
377 applied to the DNA chip. A perfusion 8 well  
378 chamber (Schleicher and Schuell BioScience,  
379 Germany) attached to the chip was used as a  
380 hybridization reaction chamber. Hybridization  
381 was performed at 50 °C for 30 min, followed by  
382 washing with washing buffer 1 for 2 min,  
383 washing buffer 2 for 2 min, and air drying at  
384 room temperature. The hybridization signal on  
385 the HPV DNA chip was visualized using a  
386 GenePix® 4000 B Microarray Scanner  
387 (Molecular Devices, Inc., Sunnyvale, CA, USA).  
388 The Ct value was obtained and analyzed for the  
389 degree of relative expression between the signal

390 of the housekeeping gene and the signal for  
391 multiple HPV-related probes after the  
392 background noise was eliminated. The cutoff  
393 value for positivity was set at greater than 2.5.  
394 The 40 types of HPV analyzed by this DNA  
395 microarray included 14 high-risk types of HPV, 6  
396 probable high-risk HPVs, 13 low-risk HPVs, and  
397 7 probable low-risk or undetermined-risk HPVs.  
398 The 14 types of HPV classified as high-risk  
399 include HPV type 16, 18, 31, 33, 35, 39, 45, 51,  
400 52, 56, 58, 59, 68A/68B and 82. The six types of  
401 HPV classified as probable high-risk included  
402 HPV types 26, 53, 66, 67, 69, and 73. The 13  
403 types of low-risk HPV include HPV type 6, 11,  
404 34, 40, 42, 43, 44, 54, 55, 61, 62, 70 and 72.  
405 The seven probable low-risk or undetermined  
406 risk types of HPV included HPV30, 32, 73, 81,  
407 84, 90, and 91. The classification of risk of  
408 various types of anogenital HPV in the current  
409 study was based on categorization of HPV types  
410 by expert working group at the International  
411 Agency for Research on Cancer (IARC) in 2009,  
412 epidemiological classification by the IARC  
413 Multicenter Cervical Cancer Study Group, and  
414 the naive Bayes classification.<sup>22-25</sup> We also  
415 referred to the classification as was used in the  
416 Hybrid Capture 2 Assay (Digene Corporation,  
417 Gaithersburg, MD, USA). Multiple HPV

418 infections were defined as co-infection with two  
419 or more types of HPV.

### 420 421 **HPV DNA sequencing assay**

422 The genotyping data obtained from the HPV  
423 chip were further confirmed in 200 samples (188  
424 specimens with mixed types on DNA chip + 12  
425 specimens with ambiguous results close to Ct  
426 value cutoff on chip scanner) by conventional  
427 direct DNA sequencing method, as described  
428 previously, but with slight modifications.<sup>20</sup> In  
429 brief, 1-3ng/μl of the PCR amplifier of the HPV  
430 L1 gene was mixed with 8 μL of ABI Prism  
431 BigDye Terminator Cycle Sequencing Ready  
432 Reaction kit version 1.1(Perkin Elmer  
433 Biosystems, USA), 2 pmol of primer, and  
434 distilled water. The reaction mixture (10 μL) was  
435 treated for 5 s at 96<sup>0</sup>C, followed by 25 cycles of  
436 96<sup>0</sup>C for 10 s, 50-C for 5 s, and 60-C for 4 min,  
437 followed by cleaning using a Centri-Sep 96 well  
438 plate or BigDye XTerminator Purification kit.  
439 After performing the post-sequencing reaction  
440 purification, samples were analyzed using an  
441 Applied Biosystems capillary electrophoresis-  
442 based genetic analyzer and then run on an ABI  
443 3730xl instrument (Perkin Elmer, USA) and  
444 analyzed with DNA sequence data collection  
445 software (Perkin Elmer). The sequence data



446 obtained by automated DNA sequencing were  
447 analyzed using a BLAST search  
448 (<http://www.ncbi.nlm.nih.gov/BLAST/>) for HPV  
449 genotyping.

450  
451

## 452 RESULTS

453

454 Figure 1 shows a representative view of  
455 genotyping results by DNA chip and DNA  
456 sequencing of various HPV types. Figure 2  
457 shows a representative view of some examples  
458 of HPV results on sequencing and the HPV DNA  
459 chip. The results of the genotyping assay for  
460 1,015 male genital warts are summarized in  
461 Table 1.

462 Of the 1050 patients recruited, 35 patients  
463 were excluded from the study because of a lack  
464 of necessary information, improper sampling, or  
465 coexisting conditions. A total of 1,015 samples  
466 showed adequate quality, as defined by positive  
467 PCR results for the beta-globin gene. Out of  
468 these 1,015 adequate samples, 1000 (98.5%)  
469 showed HPV DNA after PCR on electrophoresis  
470 and hybridization on a DNA chip. Fifteen  
471 specimens did not show HPV DNA products  
472 after PCR by both electrophoresis and  
473 hybridization on the DNA chip and were

474 excluded from the HPV genotyping analysis. In  
475 all 1000 HPV DNA-positive cases, HPV  
476 genotypic information could be obtained  
477 successfully by the HPV40 DNA chip assay. The  
478 age of the 1000 patients included in the final  
479 analysis ranged from 17 to 66 years, with an  
480 average age of 35 years. The majority of  
481 patients (85.8%) presented before the age of 40  
482 years. The location of genital warts were as  
483 follows: penile shaft (35.2%), coronal sulcus  
484 (30.0%), base of penis (12.3%), glans (9.5%),  
485 scrotum (5.8%), perineum (4.3%) and perianal  
486 area (2.9%) in decreasing order of frequency.

487 Out of 1000 samples positive for HPV DNA on  
488 analysis by using DNA chip, 200 samples were  
489 selected with mixed infection (n=188) or  
490 equivocal (close to cutoff 2.5) findings on DNA  
491 chip (n=12) analysis. A DNA sequencing assay  
492 was also performed as a validation study to  
493 confirm the results of DNA chip analysis in the  
494 above 200 samples. The results of the  
495 genotyping study by DNA chip and DNA  
496 sequencing matched 184 samples. All the  
497 remaining 16 samples were found to have mixed  
498 infection due to more than one type of HPV, in  
499 which DNA sequencing detected only one or two  
500 types of HPV(s), whereas the DNA chip showed  
501 all types of HPV present in the sample. This was

502 confirmed by a type-specific PCR assay. The  
503 results are summarized in Table 2.  
504 Depending on oncogenic risk, 94.3% of  
505 samples showed infection by low-risk HPV, 16.2%  
506 high-risk type HPV, and 10.5% both high-and  
507 low-risk HPV types, respectively.  
508 Twelve types of low-risk HPV were found in the  
509 male genital warts . HPV 6 and HPV 11 were the  
510 two most common HPV types found, and they  
511 together accounted for 82.8% of all samples of  
512 male genital warts. 17.2% showed only HPV  
513 type(s) other than HPV6 and HPV11. HPV6 was  
514 found as single infection in 47.1% (471) and as  
515 mixed infection with other HPV type(s) in 12.4%  
516 (124) of positive samples. HPV11 was found as  
517 single infection in 20.1% (201) and as mixed  
518 infection with other HPV type(s) in 4.0% (40) of  
519 positive samples. However, HPV of types other  
520 than HPV6 and HPV11 were also found at high  
521 frequencies. HPV91, HPV40, and HPV43 were  
522 some of the frequent low-risk types found in our  
523 study.  
524 Eighteen high-risk HPV types were found in  
525 the male genital warts. HPV 16 and HPV 18  
526 together accounted for 82.8% of all male genital  
527 warts. HPV18 was found in only 16 cases  
528 (1.6%). High-risk HPVs other than HPV16 or 18  
529 were found in low frequency (56.2% of high-risk

530 / 91 total) and usually were found to be co-  
531 infected with low-risk HPV (n= 105, 89.7%).  
532 Of the 188 samples that showed mixed HPV  
533 infection, the majority (167) presented with  
534 double infection, 20 with triple infection, and 1  
535 with quadruple infection. The most common type  
536 was co-infection with HPV6 and HPV16 (n=21,  
537 2.1%), followed by HPV 6 and 11 co-infection  
538 (n=10, 1%), and HPV6 and HPV 91 co-infection  
539 (n = n-10, 1%).  
540 In the present study, the most common type of  
541 HPV was HPV6 (59.5%), followed by HPV11  
542 (24.3%), HPV16 (6%), and HPV91 (5.3%).  
543 These results concur with the previous reports  
544 that HPV6 and HPV11 are the two most  
545 common HPV types found in male genital  
546 warts.<sup>35</sup> However, in our study, they together  
547 accounted for not 90% but only ~82% of male  
548 genital warts. HPV of types other than HPV6  
549 and HPV11 were also found at a high frequency  
550 (approximately about ~31.8%). 17.2% of genital  
551 wart samples showed neither HPV6 nor HPV11.  
552 The most striking finding was that high-risk  
553 HPV, including HPV16, was found in 16.2% of  
554 male genital warts. HPV types other than HPV6,  
555 11, 16, and 18, such as HPV91, HPV40, and  
556 HPV53, account for a considerable proportion  
557 (13.4%).

558 The distribution of HPV types was analyzed  
559 with respect to HPV6, HPV11, HPV16, and  
560 HPV18 as well as HPV31, 33, 45, 52, and 58 to  
561 investigate the potential protection of  
562 quadrivalent vaccines against genital warts that  
563 develop secondary to these four types of HPV  
564 (Figure 3). Of 1000 samples of male genital  
565 warts (86.6%), 866 showed HPV6, HPV11,  
566 HPV16, and HPV18. Of the genital wart samples,  
567 87.2 % and 85.9% of all genital wart samples  
568 showed HPV6, 11, 16, 18, 31, 33, 45, 52, and  
569 58.

## 571 DISCUSSION

572  
573 Genital warts are a significant public health  
574 problem. Genital warts are one of the most  
575 common sexually transmitted diseases (STDs),  
576 with an estimated 1–6 million new cases in the  
577 United States and about 30 million new cases  
578 worldwide each year.<sup>14</sup> The National Survey of  
579 USA (1999–2004) in ~8,500 sexually active men  
580 and women reported an overall 5.6% history of  
581 genital warts. In addition, studies have shown  
582 increase in the occurrence of genital warts from  
583 1966 to 2004 by 4-folds. Genital warts also incur  
584 significant healthcare costs for society.<sup>12-14, 27</sup>

585 Although genital warts are known to be benign  
586 and not associated with mortality, they show a  
587 high recurrence rate despite apparently  
588 successful therapy.<sup>12, 13, 27</sup> They can also be  
589 rarely associated with malignancy in the form of  
590 Buschke-Löwenstein tumor, and warts  
591 associated with HPV 16 and 18 may be  
592 predisposed to oncogenic transformation.<sup>14,28</sup> In  
593 some studies, women with a history of genital  
594 warts have been shown to have an increased  
595 risk of CIN and cancer, which is most likely  
596 explained by a higher risk of having other  
597 oncogenic HPV types present.<sup>10, 29</sup> This  
598 observation is supported by nationwide studies  
599 that show that approximately 30%–40% of  
600 female genital warts contain oncogenic HPV  
601 type infection.<sup>19, 30</sup>

602 There is increasing interest in understanding  
603 the burden of HPV infection and related  
604 diseases among men. Giuliano et al presented a  
605 prospective study on the incidence and  
606 clearance of HPV in men residing in Brazil,  
607 Mexico, and the USA. They were found to  
608 acquire a new genital HPV infection in high  
609 incidence (38.4 per 1000 person months). High-  
610 risk HPV types with the highest incidences were  
611 16, 51, and 52, whereas low-risk HPV types with  
612 the highest incidences were 6, 62, and 84.

613 About half of the men were found to harbor  
 614 invisible HPV infection in the genitalia.<sup>12</sup>  
 615 There is also a lot of interest in the effects of  
 616 HPV vaccines in men. Currently, the most recent  
 617 prophylactic vaccine available for the prevention  
 618 of HPV infection is Gardasil 9™ (Merck Sharp  
 619 and Dohme) containing HPV 6, 11, 16, 18, 31,  
 620 33, 45, 52, and 58. The Gardasil 9 vaccine has  
 621 been shown to have 97.4% efficacy in  
 622 preventing high-grade cervical, vulvar, and  
 623 vaginal disease for up to 6 years.<sup>33</sup> While these  
 624 vaccines primarily aim to prevent cervical  
 625 cancers caused by high-risk HPV types, the  
 626 inclusion of low-risk HPV types (HPV6 and 11)  
 627 in Gardasil™ provides an additional benefit for  
 628 preventing anogenital warts.<sup>7,9,15,16,30</sup> The HPV  
 629 vaccine is effective for the protection of  
 630 anogenital diseases regardless of HPV type by  
 631 34%.<sup>7,32</sup>  
 632 Giuliano et al. reported the efficacy and safety  
 633 of quadrivalent vaccine in the prevention of  
 634 genital warts in heterosexual boys and men  
 635 aged 16 to 23 years and male homosexual  
 636 males aged 16 to 26 years, based upon which  
 637 the United States FDA approved the use of the  
 638 vaccine in boys and men aged 9 to 26 years for  
 639 the prevention of genital warts.<sup>7,8</sup> The Gardasil 9  
 640 vaccine also benefits public health by helping

641 prevent HPV transmission to women as well as  
 642 protection in homosexual men and is currently  
 643 approved for individuals up to 45 years of  
 644 age.<sup>7,42</sup> In the per-protocol population, the  
 645 efficacy of quadrivalent vaccine against lesions  
 646 related to HPV-6, 11, 16, or 18 was 90.4%.  
 647 However, in the intention-to-treat population,  
 648 quadrivalent HPV vaccine showed an overall  
 649 efficacy of 60.2%, and the efficacy was 65.5%  
 650 for genital wart lesions related to HPV-6, 11, 16,  
 651 or 18. These data suggest that vaccines show  
 652 efficacy preferentially on genital warts related to  
 653 HPV-6, 11, 16, or 18, and overall efficacy on  
 654 entire genital warts is rather limited. It also  
 655 suggests that up to 40% of genital warts develop  
 656 due to HPV of types other than HPV6, 11, 16,  
 657 and 18.<sup>15, 16, 32, 33,</sup>  
 658 This study drew many interesting findings. Out  
 659 of 1000 HPV-positive samples, a not-so-high  
 660 proportion (18.8%) showed mixed infection due  
 661 to more than one type of HPV. Our data from  
 662 immunocompetent patients contained  
 663 significantly lower rates of mixed infection than  
 664 previous estimates (Brown et al., 1999; Aubin et  
 665 al., 2008, Han et al., 2009). Siolian L. R. Ball has  
 666 studied 31 wart tissues (both male and female,  
 667 snapped frozen and immediately submitted for  
 668 DNA extraction) that showed 71% mixed HPV

669 infections and 48% high-risk HPV. Dual  
670 infections accounted for 35%, triple 10%, and  
671 equal to or more than quadruple (26%). This  
672 raises concern that in some of the cases in the  
673 present study, the sample collection and  
674 transport in the fresh tissue state in our study  
675 may have deteriorated some of the HPV DNA.  
676 Overall, 32 types of HPV, including 18 types of  
677 high-risk HPV and 14 types of low-risk HPV,  
678 were found in male genital warts. These results  
679 suggest that contrary to common belief that HPV  
680 6 and HPV 11 induce almost all genital warts in  
681 males, a variety of HPV types can be present in  
682 male anogenital warts, and high-risk HPV  
683 infection is more frequent than previously  
684 thought.  
685 Ingles et al have conducted a similar study in  
686 which 77.2% of the EGLs were HPV positive  
687 with high-risk in 15.6% and low-risk types in  
688 73.2%.<sup>10</sup> In condylomas, 79.7% tested positive  
689 for low-risk HPV, 49.4% for HPV 6, 31.0% for  
690 HPV 11, and 8.2% for high-risk HPV,  
691 respectively.<sup>10</sup> In lesions suggestive of  
692 condyloma, 75.8% tested positive for low-risk  
693 HPV, 57.3% for HPV 6, 18.5% for HPV 11, and  
694 13.7% for high-risk HPV, respectively. Lesions  
695 with coinfections, including  $\geq 1$  high-risk and  $\geq 1$   
696 low-risk HPV type, accounted for 6.3% and

697 12.1 %, respectively, which was in the range of  
698 the results shown in our study. HPV 6, 11, 16,  
699 18, 31, 33, 45, 52, and 58 together accounted  
700 for 81.6% and 75.0%, respectively, similar to our  
701 study (85.9%).

702 These results indicate that currently available  
703 HPV vaccines targeting HPV6, 11, 16, 18, 31,  
704 33, 45, 52, or 58. will be effective for the  
705 protection of male genital warts. According to  
706 previous studies, most 9vHPV vaccine recipients  
707 seroconvert for all 9 HPV types at month 7 and  
708 antibody responses to the nine HPV types  
709 persist over 5 years.<sup>37</sup> It is suspected that the 9-  
710 valent vaccine may provide protection against  
711 >80% of male genital warts if we hypothesize  
712 that it can protect against 97% of genital lesions  
713 (efficacy calculated per Warner K Huh et al;<sup>32</sup>  
714 ~97.4%/ Elmar A Joura et al,<sup>33</sup> 96.7% in per-  
715 protocol population in cervical, vulvar, vaginal  
716 neoplasia) related to HPV6, 11, 16, 18, 31, 33,  
717 45, 52, and 58 (prevalence in warts per our  
718 study: ~86%). This may be compared to  
719 Giuliano et al., who reported an efficacy of 90.4%  
720 for the quadrivalent human papillomavirus (HPV)  
721 vaccine against external genital lesions (mainly  
722 warts) related to HPV-6, 11, 16, or 18 in healthy,  
723 predominantly heterosexual males.<sup>38</sup> In the  
724 intention-to-treat population, the observed

725 efficacy of decrease in EGLs in the vaccine  
726 group is 60.2% and 65.5% for EGLs related to  
727 HPV-6, 11, 16, or 18.<sup>38</sup> To protect against more  
728 than 90% of genital warts, a polyvalent vaccine  
729 that can include and protect against major types  
730 of HPV-inducing male genital warts, such as  
731 HPV91, HPV40, and HPV43 may be needed.

732 Given the high correlation of HIV with HPV, it  
733 may be suggested that HPV vaccination should  
734 be mandatory and anal wart/cancer surveillance  
735 is recommended in people with HIV. According  
736 to published meta-analysis, HPV incidence and  
737 high-risk HPV incidence approximately doubled  
738 among HIV patients and HPV clearance rate  
739 approximately halved. HIV incidence almost  
740 doubled in the presence of prevalent HPV  
741 infection.<sup>39</sup> In another metanalysis, HIV-positive  
742 versus HIV-negative men had anal HPV-16  
743 prevalence of 35.4% versus 12.5% and pooled  
744 anal cancer incidence was 45.9 per 100 000  
745 men versus 5.1 per 100 000 men.<sup>40, 41</sup>

746 In addition, catch-up vaccination with booster  
747 shots and mixed vaccine schedules should be  
748 considered, especially in HIV-positive men. The  
749 study by Simoens et al. showed that gender-  
750 neutral vaccination (GNV) with catch-up 9vHPV  
751 vaccine showed reductions of 30.3% and 44.6%  
752 for genital warts in females and males,

753 respectively.<sup>36</sup> Studies have shown that HPV  
754 prevalence in MSM (men who have sex with  
755 men) is significantly higher than that in  
756 heterosexual men, whose HPV prevalence is  
757 similar to that of women,<sup>41</sup> and HPV prevalence  
758 in HIV-positive men is significantly higher than  
759 that in HIV-negative men.<sup>39-42</sup>

760 The results of our study differs from that of  
761 previous studies in that we found that there were  
762 a lot of non-HPV 6/11 strains in the warts.<sup>4, 17-19</sup>  
763 The significance and role of high-risk HPVs in  
764 male genital warts, even though highly prevalent  
765 (16.2% in our study; 14%–44% in  
766 immunocompetent, 47%–100% in  
767 immunosuppressed and HIV-positive)<sup>35</sup> is not  
768 clear. The detection of HPV DNA by DNA  
769 chip/sequencing alone does not directly indicate  
770 the presence of HPV infection. We cannot  
771 completely exclude the possibility of high-risk  
772 HPV DNAs being contaminated from other areas  
773 of genital areas or cancer/precancer tissue  
774 being included despite the pathologic diagnosis.  
775 A recent study on HPV in males showed a high  
776 prevalence of HPV (~50%) in grossly normal-  
777 looking areas of male genitalia, of which HPV 16  
778 and other high-risk HPV were even higher than  
779 low-risk HPVs.<sup>10</sup> However, high-risk HPV alone  
780 was found without co-infection with low-risk HPV

781 in 53 samples (45 single, 8 mixed). A recent  
 782 study indicated that precancerous lesions and  
 783 even invasive cancers are found in high  
 784 frequency within anal condyloma in MSM. This  
 785 suggests caution for genital warts infected by  
 786 HPV16 that may require meticulous follow-up of  
 787 not only patients but also their sexual partners.  
 788 Further studies on the significance and  
 789 management of high-risk HPV DNA in genital  
 790 warts are necessary.

791 The strengths of this study include the size of  
 792 the cohort and the pathologic diagnosis of  
 793 lesions to allow for accurate detection of lesions.  
 794 To our knowledge, this is one of the largest  
 795 scale HPV genotyping studies in male genital  
 796 warts carried out in a prospective, multicenter  
 797 study. In previous studies, up to a total of 755  
 798 patients were tested and they used a rather  
 799 limited genotyping assay and tested HPV types  
 800 of from 5 to 24 in number.<sup>10, 17-19</sup> In the present  
 801 study, we tested 1000 samples by using PCR  
 802 followed by DNA microarray. GG HPV DNA  
 803 microarray is a high-throughput assay that can  
 804 detect the 40 types of HPV in a highly sensitive  
 805 (detects 10-100 copies of HPV DNA) way. We  
 806 also added a DNA sequencing assay in order to  
 807 confirm and validate the results of the DNA chip.

808 Another strength includes the use of formalin-  
 809 fixed biopsy tissue for genotyping, as the biopsy  
 810 results have been shown to accurately reflect  
 811 the HPV genotypes found within these lesions.  
 812 In contrast to previous studies in which samples  
 813 were taken from the surface of warts using a  
 814 brush swab, which carries the risk of  
 815 contamination from other areas of genital skin,  
 816 we obtained fresh tissue fragments of warts by  
 817 excisional biopsy in a sterile manner and tested  
 818 its total genomic DNA. Most other studies have  
 819 used PCR amplification with sequencing or  
 820 hybridization that are so sensitive that they may  
 821 also detect HPV DNA in the anogenital region in  
 822 asymptomatic individuals.<sup>35</sup>

823 However, the present study has some  
 824 limitations. The target population of the study  
 825 was Korean men. Therefore, data from this  
 826 study may not be directly applicable to other  
 827 races or geographical areas. Further studies  
 828 such as this may be mandatory in men from  
 829 races other than Korean or Asian and areas in  
 830 Western countries or Africa. However, the  
 831 genotypic distribution of genital warts in the  
 832 present study is similar to that of recent studies.  
 833 Additional international studies are needed to  
 834 understand the prevalence of HPV, especially  
 835 high-risk HPV, in anal warts, and the impact of

836 HPV vaccines on anal warts, especially in  
837 relation to HIV status and sexual orientation.  
838 The 15 HPV-negative wart samples and 16  
839 samples with discrepant results between  
840 sequencing and DNA chip is also a problem.  
841 These might have not been real warts or warts  
842 but with HPV DNA copy of below detection limit.  
843 In addition, the HIV positivity and sexual  
844 orientations of the study population have not  
845 been investigated; this should be a point of  
846 concern. Additional international studies are  
847 needed to understand the prevalence of HPV,  
848 especially high-risk HPV, in anal warts, and the  
849 impact of HPV vaccines on anal warts,  
850 especially in relation to HIV status and sexual  
851 orientation.

## 852 REFERENCES

853 1. Cogliano V, Baan R, Straif K, Grosse Y,  
854 Secretan B, El Ghissassi F; WHO International  
855 Agency for Research on Cancer.  
856 Carcinogenicity of human papillomaviruses.  
857 *Lancet Oncol* 2005; 6: 204.  
858 2. Gheit T. Mucosal and Cutaneous Human  
859 Papillomavirus Infections and Cancer Biology.  
860 *Front Oncol*. 2019 May 8;9:355. doi:  
861 10.3389/fonc.2019.00355. PMID: 31134154;  
862  
863 PMID: PMC6517478.

864 3. Giuliano AR, Tortolero-Luna G, Ferrer E,  
865 Burchell AN, de Sanjose S, Kjaer SK, Muñoz N,  
866 Schiffman M, Bosch FX. Epidemiology of human  
867 papillomavirus infection in men, cancers other  
868 than cervical and benign conditions. *Vaccine*.  
869 2008 Aug 19;26 Suppl 10(0 10):K17-28. doi:  
870 10.1016/j.vaccine.2008.06.021. PMID:  
871 18847554; PMCID: PMC4366004.  
872 4. Lynge E, Rebolj M. Primary HPV screening  
873 for cervical cancer prevention: results from  
874 European trials. *Nat Rev Clin Oncol*.  
875 2009 ;6(12):699-706.  
876 5. Petrosky E, Bocchini JA Jr, Hariri S, Chesson  
877 H, Curtis CR, Saraiya M, Unger ER, Markowitz  
878 LE; Centers for Disease Control and Prevention  
879 (CDC). Use of 9-valent human papillomavirus  
880 (HPV) vaccine: updated HPV vaccination  
881 recommendations of the advisory committee on  
882 immunization practices. *MMWR Morb Mortal*  
883 *Wkly Rep*. 2015 Mar 27;64(11):300-4. PMID:  
884 25811679; PMCID: PMC4584883.  
885 6. Lauri E, Markowitz, Eileen F. Dunne, Mona  
886 Saraiya, Herschel W. Lawson, Harrell Chesson,  
887 Elizabeth R. Unger. Recommendations of the  
888 Advisory Committee on Immunization Practices  
889 (ACIP).  
890 [https://www.cdc.gov/mmwr/preview/mmwrhtml/rr](https://www.cdc.gov/mmwr/preview/mmwrhtml/rr5602a1.htm)  
891 [5602a1.htm](https://www.cdc.gov/mmwr/preview/mmwrhtml/rr5602a1.htm).



892 7. FDA NEWS RELEASE. FDA approves  
 893 expanded use of Gardasil 9 to include  
 894 individuals 27 through 45 years old. October 05,  
 895 2018. [https://www.fda.gov/news-events/press-](https://www.fda.gov/news-events/press-announcements/fda-approves-expanded-use-gardasil-9-include-individuals-27-through-45-years-old)  
 896 [announcements/fda-approves-expanded-use-](https://www.fda.gov/news-events/press-announcements/fda-approves-expanded-use-gardasil-9-include-individuals-27-through-45-years-old)  
 897 [gardasil-9-include-individuals-27-through-45-](https://www.fda.gov/news-events/press-announcements/fda-approves-expanded-use-gardasil-9-include-individuals-27-through-45-years-old)  
 898 [years-old](https://www.fda.gov/news-events/press-announcements/fda-approves-expanded-use-gardasil-9-include-individuals-27-through-45-years-old)  
 899 8. <https://www.cdc.gov/hpv/parents/vaccine.html>  
 900 9. Salaheddin M. Mahmud, Keira Robinson,  
 901 Harriet Richardson, Pierre-Paul Tellier, Alex S.  
 902 Ferenczy, Michel Roger, François Coutlée,  
 903 Eduardo L. Franco, HLA Polymorphisms and  
 904 Cervical Human Papillomavirus Infection in a  
 905 Cohort of Montreal University Students, The  
 906 Journal of Infectious Diseases, Volume 196,  
 907 Issue 1, 1 July 2007, Pages 82–90,  
 908 <https://doi.org/10.1086/518612>  
 909 10. Ingles DJ, Pierce Campbell CM, Messina JA,  
 910 Stoler MH, Lin HY, Fulp WJ, Abrahamsen M,  
 911 Sirak BA, O'Keefe MT, Papenfuss M, Gage C,  
 912 Carvalho da Silva R, Gonzalez Sosa R, Rojas  
 913 Juarez O, Villa LL, Lazcano Ponce E, Giuliano  
 914 AR. Human papillomavirus virus (HPV)  
 915 genotype- and age-specific analyses of external  
 916 genital lesions among men in the HPV Infection  
 917 in Men (HIM) Study. J Infect Dis. 2015 Apr  
 918 1;211(7):1060-7. doi: 10.1093/infdis/jiu587.

919 Epub 2014 Oct 24. PMID: 25344518; PMCID:  
 920 PMC4432433.  
 921 11. Dillner J, von Krogh G, Horenblas S, Meijer  
 922 CJ. Etiology of squamous cell carcinoma of the  
 923 penis. Scand J Urol Nephrol Suppl. 2000;  
 924 205:189–93. [PubMed: 11144896]  
 925 12. Giuliano AR, Lee JH, Fulp W, Villa LL,  
 926 Lazcano E, Papenfuss MR, Abrahamsen M,  
 927 Salmeron J, Anic GM, Rollison DE, Smith D.  
 928 Incidence and clearance of genital human  
 929 papillomavirus infection in men (HIM): a cohort  
 930 study. Lancet. 2011 : 12;377(9769):932-40.  
 931 13. Giuliano AR, Anic G, Nyitray AG.  
 932 Epidemiology and pathology of HPV disease in  
 933 males. Gyne Oncol 2010;117;S15-19.  
 934 14. Yanofsky VR, Patel RV, Goldenberg G.  
 935 Genital warts: a comprehensive review. J Clin  
 936 Aesthet Dermatol. 2012 Jun;5(6):25-36. PMID:  
 937 22768354; PMCID: PMC3390234.  
 938 15. Centers for Disease Control and Prevention  
 939 (CDC). FDA licensure of quadrivalent human  
 940 papillomavirus vaccine (HPV4, Gardasil) for use  
 941 in males and guidance from the Advisory  
 942 Committee on Immunization Practices (ACIP).  
 943 MMWR Morb Mortal Wkly Rep. 2010:  
 944 59(20):630-2  
 945 16. Potocnik M, Kocjan BJ, Seme K, Polijak M.  
 946 Distribution of human papillomavirus (HPV)

페이지 33

페이지 34

947 genotypes in genital warts from male in Slovenia.  
948 *Acta Dermatovenerol Alp Panonica Adrat*  
949 2007; 16;91-6, 98.  
950 17. Chan PKS, Luk ACS, Luk TNM, Lee K,  
951 Cheung JLK, Ho K, L K. Distribution of human  
952 papillomavirus types in anogenital warts of men. *J*  
953 *Clin Virol* 2009;44:111-114.  
954 18. Aubin, F., Pretet, J.-L., Jacquard, A.-C.,  
955 Saunier, M., Carcopino, X., Jaroud, F., Pradat,  
956 P., Soubeyrand, B., Leocmach, Y., Mougin, C.,  
957 Riethmuller, D., EDiTH Study Group, Human  
958 Papillomavirus Genotype Distribution in External  
959 Acuminata Condylomata: A Large French  
960 National Study (EDiTH IV). *Clinical Infectious*  
961 *Diseases*. 2008; 47: 610-615  
962 19. Luxembourg A, Moeller E. 9-Valent human  
963 papillomavirus vaccine: a review of the clinical  
964 development program. *Expert Rev Vaccines*.  
965 2017 Nov;16(11):1119-1139. doi:  
966 10.1080/14760584.2017.1383158. Epub 2017  
967 Oct 9. PMID: 28956458.  
968 20. Brotherton JML, Giuliano AR, Markowitz LE,  
969 Dunne EF, Ogilvie GS. Monitoring the impact of  
970 HPV vaccine in males-Considerations and  
971 challenges. *Papillomavirus Res*. 2016  
972 Dec;2:106-111. doi: 10.1016/j.pvr.2016.05.001.  
973 Epub 2016 May 17. PMID: 29074169; PMCID:  
974 PMC5886861.

975 21. Kim KH, Yoon MS, Na YJ, Park CS, Oh MR,  
976 Moon WC. Development and evaluation of  
977 highly sensitive human papillomavirus  
978 genotyping DNA chip. *Gyne Oncol*. 2006: 100(1):  
979 38-43.  
980 22. Munoz N, Bosch FX, de Sanjose S, Herrero  
981 R, Castellsague X, Shah KV, et al.  
982 Epidemiological classification of human  
983 papillomavirus types associated with cervix  
984 cancer. *N Engl J Med* 2003;348:518– 27.  
985 23. Giuliano AR, Palefsky JM, Goldstone S,  
986 Moreira ED Jr, Penny ME, Aranda C, Vardas E,  
987 Moi H, Jessen H, Hillman R, Chang YH, Ferris D,  
988 Rouleau D, Bryan J, Marshall JB, Vuocolo S,  
989 Barr E, Radley D, Haupt RM, Guris D. Efficacy  
990 of quadrivalent HPV vaccine against HPV  
991 Infection and disease in males. *N Engl J Med*.  
992 2011 Feb 3;364(5):401-11.  
993 23. Asato T, Maehama T, Nagai Y, Kanazawa K,  
994 Uezato H, Kariya K. A large case-control study  
995 of cervical cancer risk associated with human  
996 papillomavirus infection in Japan, by nucleotide  
997 sequencing-based genotyping. *J Infect Dis*  
998 2004;189:1829.  
999 24. Bouvard V, Baan R, Straif K, Grosse Y,  
1000 Secretan B, El Ghissassi F, Benbrahim-Tallaa L,  
1001 Guha N, Freeman C, Galichet L, Coglianò V;  
1002 WHO International Agency for Research on

1003 Cancer Monograph Working Group A review of  
1004 human carcinogens--Part B: biological agents.  
1005 Lancet Oncol. 2009 Apr;10(4):321-2.  
1006 25. de Villiers EM, Fauquet C, Broker TR,  
1007 Bernard HU, zur Hausen H. Classification of  
1008 papillomaviruses. Virology. 2004; 324:17-27.  
1009 26. Center for Disease Control and Prevention  
1010 2008. Available at : <http://www.cdc.gov/>  
1011 accessed on 07-01-2021.  
1012 27. Kraut AA, Schink T, Schulze-Rath R,  
1013 Mikolajczyk RT, Garbe E. Incidence of  
1014 anogenital warts in Germany: a population-  
1015 based cohort study. BMC Infect Dis.  
1016 2010;10:360-366.  
1017 28. Balik E, Eren T, Bugra D. A surgical  
1018 approach to anogenital Buschke Löwenstein  
1019 tumours (giant condyloma acuminata). Acta Chir  
1020 Belg. 2009 ; 109(5):612-6.).  
1021 29. Ghaly AF, Duncan ID, Nicoll SM. Should  
1022 women with genital condyloma acuminata have  
1023 routine diagnostic colposcopy in addition to  
1024 cervical smear screening? J Obstet Gynaecol.  
1025 1999 : 19(5):500-2.  
1026 30. Garland SM, Steben M, Sings HL, James M,  
1027 Lu S, Railkar R, Barr E, Haupt RM, Joura EA.  
1028 Natural history of genital warts: analysis of the  
1029 placebo arm of 2 randomized phase III trials of a  
1030 quadrivalent human papillomavirus (types 6, 11,

1031 16, and 18) vaccine. J Infect Dis. 2009; 199(6):  
1032 805-14.  
1033 31. Yanofsky VR, Patel RV, Goldenberg G.  
1034 Genital warts: a comprehensive review. J Clin  
1035 Aesthet Dermatol. 2012 Jun;5(6):25-36. PMID:  
1036 22768354; PMCID: PMC3390234.  
1037 31. Garland SM, Hernandez-Avila M, Wheeler  
1038 CM, Perez G, Harper DM, Leodolter S, Tang  
1039 GW, Ferris DG, Steben M, Bryan J, Taddeo FJ,  
1040 Railkar R, Esser MT, Sings HL, Nelson M,  
1041 Boslego J, Sattler C, Barr E, Koutsky LA;  
1042 Females United to Unilaterally Reduce  
1043 Endo/Ectocervical Disease (FUTURE) I  
1044 Investigators. Quadrivalent vaccine against  
1045 human papillomavirus to prevent anogenital  
1046 diseases. N Engl J Med. 2007; 356(19):1928-43.  
1047 32. Huh WK, Joura EA, Giuliano AR, Iversen OE,  
1048 de Andrade RP, Ault KA, Bartholomew D,  
1049 Cestero RM, Fedrizzi EN, Hirschberg AL,  
1050 Mayrand MH, Ruiz-Sternberg AM, Stapleton JT,  
1051 Wiley DJ, Ferenczy A, Kurman R, Ronnett BM,  
1052 Stoler MH, Cuzick J, Garland SM, Kjaer SK,  
1053 Bautista OM, Haupt R, Moeller E, Ritter M,  
1054 Roberts CC, Shields C, Luxembourg A. Final  
1055 efficacy, immunogenicity, and safety analyses of  
1056 a nine-valent human papillomavirus vaccine in  
1057 women aged 16-26 years: a randomised,  
1058 double-blind trial. Lancet. 2017 Sep 5. pii:

1059 S0140-6736(17)31821-4. doi: 10.1016/S0140-  
1060 6736(17)31821-4. [Epub ahead of print] PubMed  
1061 PMID: 28886907.  
1062 33. Joura EA, Giuliano AR, Iversen OE,  
1063 Bouchard C, Mao C, Mehlsen J, Moreira ED Jr,  
1064 Ngan Y, Petersen LK, Lazcano-Ponce E,  
1065 Pitisuttithum P, Restrepo JA, Stuart G, Woelber  
1066 L, Yang YC, Cuzick J, Garland SM, Huh W,  
1067 Kjaer SK, Bautista OM, Chan IS, Chen J,  
1068 Gesser R, Moeller E, Ritter M, Vuocolo S,  
1069 Luxembourg A; Broad Spectrum HPV Vaccine  
1070 Study. A 9-valent HPV vaccine against infection  
1071 and intraepithelial neoplasia in women. *N Engl J*  
1072 *Med.* 2015 Feb 19;372(8):711-23. doi:  
1073 10.1056/NEJMoa1405044. PubMed PMID:  
1074 25693011.  
1075 34. Moreira ED Jr, Block SL, Ferris D, Giuliano  
1076 AR, Iversen OE, Joura EA, Kosalaraksa P,  
1077 Schilling A, Van Damme P, Bornstein J, Bosch  
1078 FX, Pils S, Cuzick J, Garland SM, Huh W, Kjaer  
1079 SK, Qi H, Hyatt D, Martin J, Moeller E, Ritter M,  
1080 Baudin M, Luxembourg A. Safety Profile of the  
1081 9-Valent HPV Vaccine: A Combined Analysis of  
1082 7 Phase III Clinical Trials. *Pediatrics.* 2016  
1083 Aug;138(2). pii: e20154387. doi:  
1084 10.1542/peds.2015-4387. Epub 2016 Jul 15.  
1085 PubMed PMID: 27422279.

1086 35. Siolian Liewang Rita Ball, David Winder,  
1087 Katie Vaughan, Nashat Hanna, Jonathan Andre  
1088 Michel Salomon Levy, et al. Analyses of human  
1089 papillomavirus genotypes and viral loads in  
1090 anogenital warts. *Journal of Medical Virology,*  
1091 *Wiley-Blackwell,* 2011, 83 (8), pp.1345.  
1092 10.1002/jmv.22111 . hal-00652144  
1093 36. Simoens S, Bento-Abreu A, Merckx B,  
1094 Joubert S, Vermeersch S, Pavelyev A, Varga S,  
1095 Morais E. Health Impact and Cost-Effectiveness  
1096 of Implementing Gender-Neutral Vaccination  
1097 With the 9-Valent Human Papillomavirus  
1098 Vaccine in Belgium. *Front Pharmacol.* 2021 Apr  
1099 12;12:628434. doi: 10.3389/fphar.2021.628434.  
1100 PMID: 33912045; PMCID: PMC8072375.  
1101 37. Ruiz-Sternberg ÁM, Moreira ED Jr, Restrepo  
1102 JA, Lazcano-Ponce E, Cabello R, Silva A,  
1103 Andrade R, Revollo F, Uscanga S, Victoria A,  
1104 Guevara AM, Luna J, Plata M, Dominguez CN,  
1105 Fedrizzi E, Suarez E, Reina JC, Ellison MC,  
1106 Moeller E, Ritter M, Shields C, Cashat M, Perez  
1107 G, Luxembourg A. Efficacy, immunogenicity,  
1108 and safety of a 9-valent human papillomavirus  
1109 vaccine in Latin American girls, boys, and young  
1110 women. *Papillomavirus Res.* 2018 Jun;5:63-74.  
1111 doi: 10.1016/j.pvr.2017.12.004. Epub 2017 Dec  
1112 19. PMID: 29269325; PMCID: PMC5887018.

1113 38. Giuliano AR, Palefsky JM, Goldstone S,  
 1114 Moreira ED, Penny ME, Aranda C, Vardas E,  
 1115 Moi H, Jessen H, Hillman R, Chang YH, Ferris D,  
 1116 Rouleau D, Bryan J, Marshall JB, Vuocolo S,  
 1117 Barr E, Radley D, Haupt RM, Guris D (2011)  
 1118 Efficacy of quadrivalent HPV vaccine against  
 1119 HPV infection and disease in males. *N Engl J*  
 1120 *Med* 364(5):401–411.  
 1121 <https://doi.org/10.1056/NEJMoa0909537>  
 1122 39. Looker KJ, Rönn MM, Brock PM, Brisson M,  
 1123 Drolet M, Mayaud P, Boily MC (2018) Evidence  
 1124 of synergistic relationships between HIV and  
 1125 human papillomavirus (HPV): systematic  
 1126 reviews and meta-analyses of longitudinal  
 1127 studies of HPV acquisition and clearance by HIV  
 1128 status, and of HIV acquisition by HPV status. *J*  
 1129 *Int AIDS Soc* 21(6):e25110.  
 1130 <https://doi.org/10.1002/jia2.25110>  
 1131 40. Machalek DA, Poynten M, Jin F, Fairley CK,  
 1132 Farnsworth A, Garland SM, Hillman RJ,  
 1133 Petoumenos K, Roberts J, Tabrizi SN,  
 1134 Templeton DJ, Grulich AE (2012) Anal human  
 1135 papillomavirus infection and associated  
 1136 neoplastic lesions in men who have sex with  
 1137 men: a systematic review and meta-analysis.  
 1138 *Lancet Oncol* 13(5):487–500.  
 1139 [https://doi.org/10.1016/s1470-2045\(12\)70080-3](https://doi.org/10.1016/s1470-2045(12)70080-3)

1140 41. Ma X, Wang Q, Ong JJ, Fairley CK, Su S,  
 1141 Peng P, Jing J, Wang L, Soe NN, Cheng F,  
 1142 Zhang L (2018) Prevalence of human  
 1143 papillomavirus by geographical regions, sexual  
 1144 orientation and HIV status in China: a systematic  
 1145 review and meta-analysis. *Sex Transm Infect*  
 1146 94(6):434–442. [https://doi.org/10.1136/sextrans-](https://doi.org/10.1136/sextrans-2017-053412)  
 1147 [2017-053412](https://doi.org/10.1136/sextrans-2017-053412)  
 1148 42. Zou H, Zhang L, Puifung CE, Zhang L (2014)  
 1149 Teenage men who have sex with men should be  
 1150 vaccinated against human papillomavirus  
 1151 infection. *Zhonghua Liu Xing Bing Xue Za Zhi*  
 1152 35(9):1072–1073

#### 1153 **Author contributions**

1154 WM, JM, JJ, JY, and Korean Male HPV study  
 1155 group conceived of the presented idea. JJ and  
 1156 JY helped collect the samples and were involved  
 1157 in planning and supervising the work. WM and  
 1158 JM designed and performed the experiments,  
 1159 derived the models and analysed the data. WM  
 1160 and JM wrote the manuscript with support from  
 1161 JJ and JY.

#### 1162 **Conflict of interest**

1163 JM currently works for the Cellgenemedix, which  
 1164 is the distributor of the Good Gene, InC (Seoul,  
 1165 South Korea). Data collection for this study was  
 1166  
 1167

1168 undertaken while JM was affiliated to GG. All  
1169 opinions presented in this manuscript belong to  
1170 the authors alone, and not any institution to  
1171 which they are or were affiliated. The remaining  
1172 author (YC) has no conflicts of interest to  
1173 declare.

1174

#### 1175 **Funding statement**

1176 The current study is supported by Good Gene,  
1177 InC in which JM and WM is a part of and the  
1178 Korean Male HPV study group, in which JM, JJ,  
1179 JY is a part of. The sample collection was  
1180 resourced by Department of Urology, Dong-A  
1181 university, Busan Korea, in which JJ and JY is a  
1182 part of.

1183

**Table 1. Genotypic distribution of HPV in 1,015 male genital warts**

| LOW                        | SINGL<br>E | %*        | MIXE<br>D | %*        | TOTA<br>L | %*    | HIGH                         | SINGL<br>E | %*        | MIXE<br>D | %*        | TOTA<br>L | %*     |
|----------------------------|------------|-----------|-----------|-----------|-----------|-------|------------------------------|------------|-----------|-----------|-----------|-----------|--------|
| 6                          | 471        | 47.1<br>0 | 124       | 12.4<br>0 | 595       | 59.50 | 16                           | 22         | 2.42      | 35        | 3.86      | 57        | 6.28   |
| 11                         | 201        | 20.1<br>0 | 42        | 4.20      | 243       | 24.30 | 18                           | 2          | 0.22      | 6         | 0.66      | 8         | 0.88   |
| 30                         | 3          | 0.30      | 3         | 0.30      | 6         | 0.60  | 26                           | 0          | 0.00      | 0         | 0.00      | 0         | 0.00   |
| 32                         | 4          | 0.40      | 2         | 0.20      | 6         | 0.60  | 31                           | 0          | 0.00      | 1         | 0.11      | 1         | 0.11   |
| 34                         | 0          | 0.00      | 0         | 0.00      | 0         | 0.00  | 33                           | 2          | 0.22      | 2         | 0.22      | 4         | 0.44   |
| 40                         | 21         | 2.10      | 12        | 1.20      | 33        | 3.30  | 35                           | 0          | 0.00      | 5         | 0.55      | 5         | 0.55   |
| 42                         | 2          | 0.20      | 2         | 0.20      | 4         | 0.40  | 39                           | 0          | 0.00      | 3         | 0.33      | 3         | 0.33   |
| 43                         | 14         | 1.40      | 7         | 0.70      | 21        | 2.10  | 45                           | 1          | 0.11      | 2         | 0.22      | 3         | 0.33   |
| 44                         | 2          | 0.20      | 1         | 0.10      | 3         | 0.30  | 51                           | 1          | 0.11      | 6         | 0.66      | 7         | 0.77   |
| 54                         | 2          | 0.20      | 0         | 0.00      | 2         | 0.20  | 52                           | 0          | 0.00      | 1         | 0.11      | 1         | 0.11   |
| 55                         | 6          | 0.60      | 3         | 0.30      | 9         | 0.90  | 53                           | 2          | 0.22      | 14        | 1.54      | 16        | 1.76   |
| 616                        | 0          | 0.00      | 0         | 0.00      | 0         | 0.00  | 56                           | 1          | 0.11      | 8         | 0.88      | 9         | 0.99   |
| 62                         | 0          | 0.00      | 2         | 0.20      | 2         | 0.20  | 58                           | 1          | 0.11      | 1         | 0.11      | 2         | 0.22   |
| 70                         | 2          | 0.20      | 2         | 0.20      | 4         | 0.40  | 59                           | 0          | 0.00      | 5         | 0.55      | 5         | 0.55   |
| 72                         | 0          | 0.00      | 6         | 0.60      | 6         | 0.60  | 66                           | 0          | 0.00      | 4         | 0.44      | 4         | 0.44   |
| 81                         | 0          | 0.00      | 1         | 0.10      | 1         | 0.10  | 67                           | 0          | 0.00      | 5         | 0.55      | 5         | 0.55   |
| 83                         | 2          | 0.20      | 3         | 0.30      | 5         | 0.50  | 68A/B                        | 4          | 0.44      | 6         | 0.66      | 10        | 1.10   |
| 84                         | 2          | 0.20      | 13        | 1.30      | 15        | 1.50  | 69                           | 0          | 0.00      | 1         | 0.11      | 1         | 0.11   |
| 90                         | 9          | 0.90      | 8         | 0.80      | 17        | 1.70  | 73                           | 0          | 0.00      | 0         | 0.00      | 0         | 0.00   |
| 91                         | 26         | 2.60      | 27        | 2.70      | 53        | 5.30  | 82                           | 0          | 0.00      | 2         | 0.22      | 2         | 0.22   |
| <b>LOW</b>                 | 767        | 76.7<br>0 | 176       | 17.6<br>0 | 943       | 94.30 | <b>HIGH</b>                  | 45         | 4.5       | 117       | 11.70     | 162       | 16.2   |
| <b>LOW OTHER THAN 6,11</b> | 95         | 9.50      | 20        | 2.00      | 115       | 11.50 | <b>HIGH OTHER THAN 16,18</b> | 18         | 1.80      | 73        | 7.30      | 91        | 9.10   |
| <b>LOW AND HIGH MIXED</b>  |            |           |           |           | 105       | 10.50 | <b>HIGH ONLY MIXED</b>       |            |           | 8         |           | 8         | 0.80   |
| <b>NEGATIVE</b>            |            |           |           |           | 15        | 1.48* | <b>TOTAL POSITIVE</b>        | 812        | 81.2<br>0 | 188       | 19.4<br>8 | 1000      | 98.52* |

\* Of 1000 positive specimens

\*\*Of

1015

total

specimens





**Table 2. Sequencing Results vs HPV DNA chip results in 16 specimens with discrepancy.**

Samples were assayed for the appearance of HPV as described in the results section. ‘–’ denotes not significantly positive during assay. All 16 samples were found to have mixed infection due to more than 1 type of HPV, in which DNA sequencing detected only 1 or 2 types of HPV(s), whereas DNA chip showed all the types of HPV present in the sample. HPV chip results were confirmed to be true by type specific PCR assay.

| SAMPLE NUMBER | HPV CHIP |           | SEQUENCING |           | CT VALUE (AVERAGE) |
|---------------|----------|-----------|------------|-----------|--------------------|
|               | low risk | high risk | low risk   | high risk |                    |
| 7             | 6        | 53        | 6          | -         | 2.9                |
| 40            | 6,91     | 18        | 6          | 18        | 2.7                |
| 90            | 6, 40    | 66        | 6          | 66        | 2.5                |
| 96            | 6, 40    | 16        | 40         | 16        | 2.8                |
| 128           | 6, 40    | 16        | 40         | 66        | 2.6                |
| 133           | 6, 84    | -         | 6          | -         | 3                  |
| 237           | 6,11, 84 | -         | 6, 11      | -         | 3                  |
| 359           | 11, 91   | 16        | 11         | 16        | 2.4                |
| 536           | 40, 69   | 16,18     | 40         | 16, 18    | 2.7                |
| 577           | 6, 72    | 16        | 6          | 16        | 2.5                |
| 640           | 40       | 16, 58    | 40         | 16        | 2.9                |
| 720           | 6        | 16,18     | 6          | 16        | 2.4                |
| 740           | 6        | 56, 82    | 6          | 82        | 3                  |
| 767           | 6, 54    | 59        | 6          | 59        | 2.6                |
| 776           | 90       | 68, 82    | 90         | 68        | 2.7                |
| 906           | 6        | 35, 18    | 6          | 18        | 2.8                |

**Figure 1. Representative view of HPV genotyping by using DNA microarray and sequencing assay**

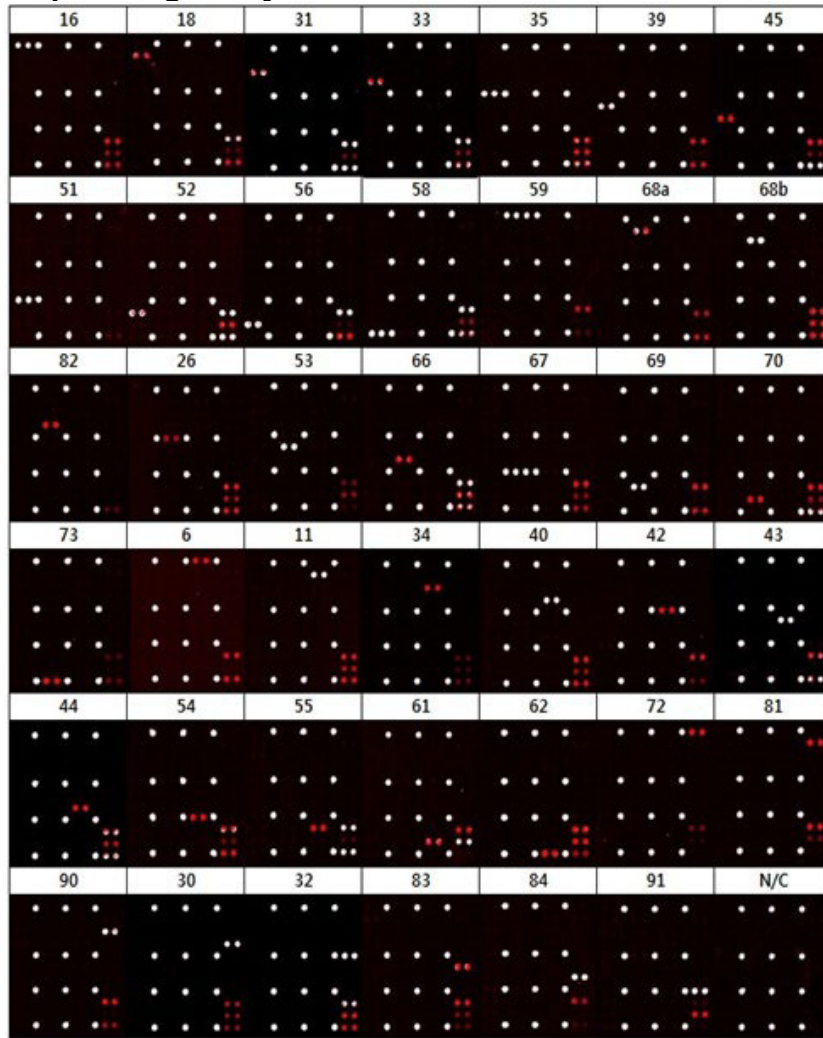

Figure 3. Genotypic distribution of 1,015 male genital warts as related with HPV6, HPV11, HPV16 and HPV18

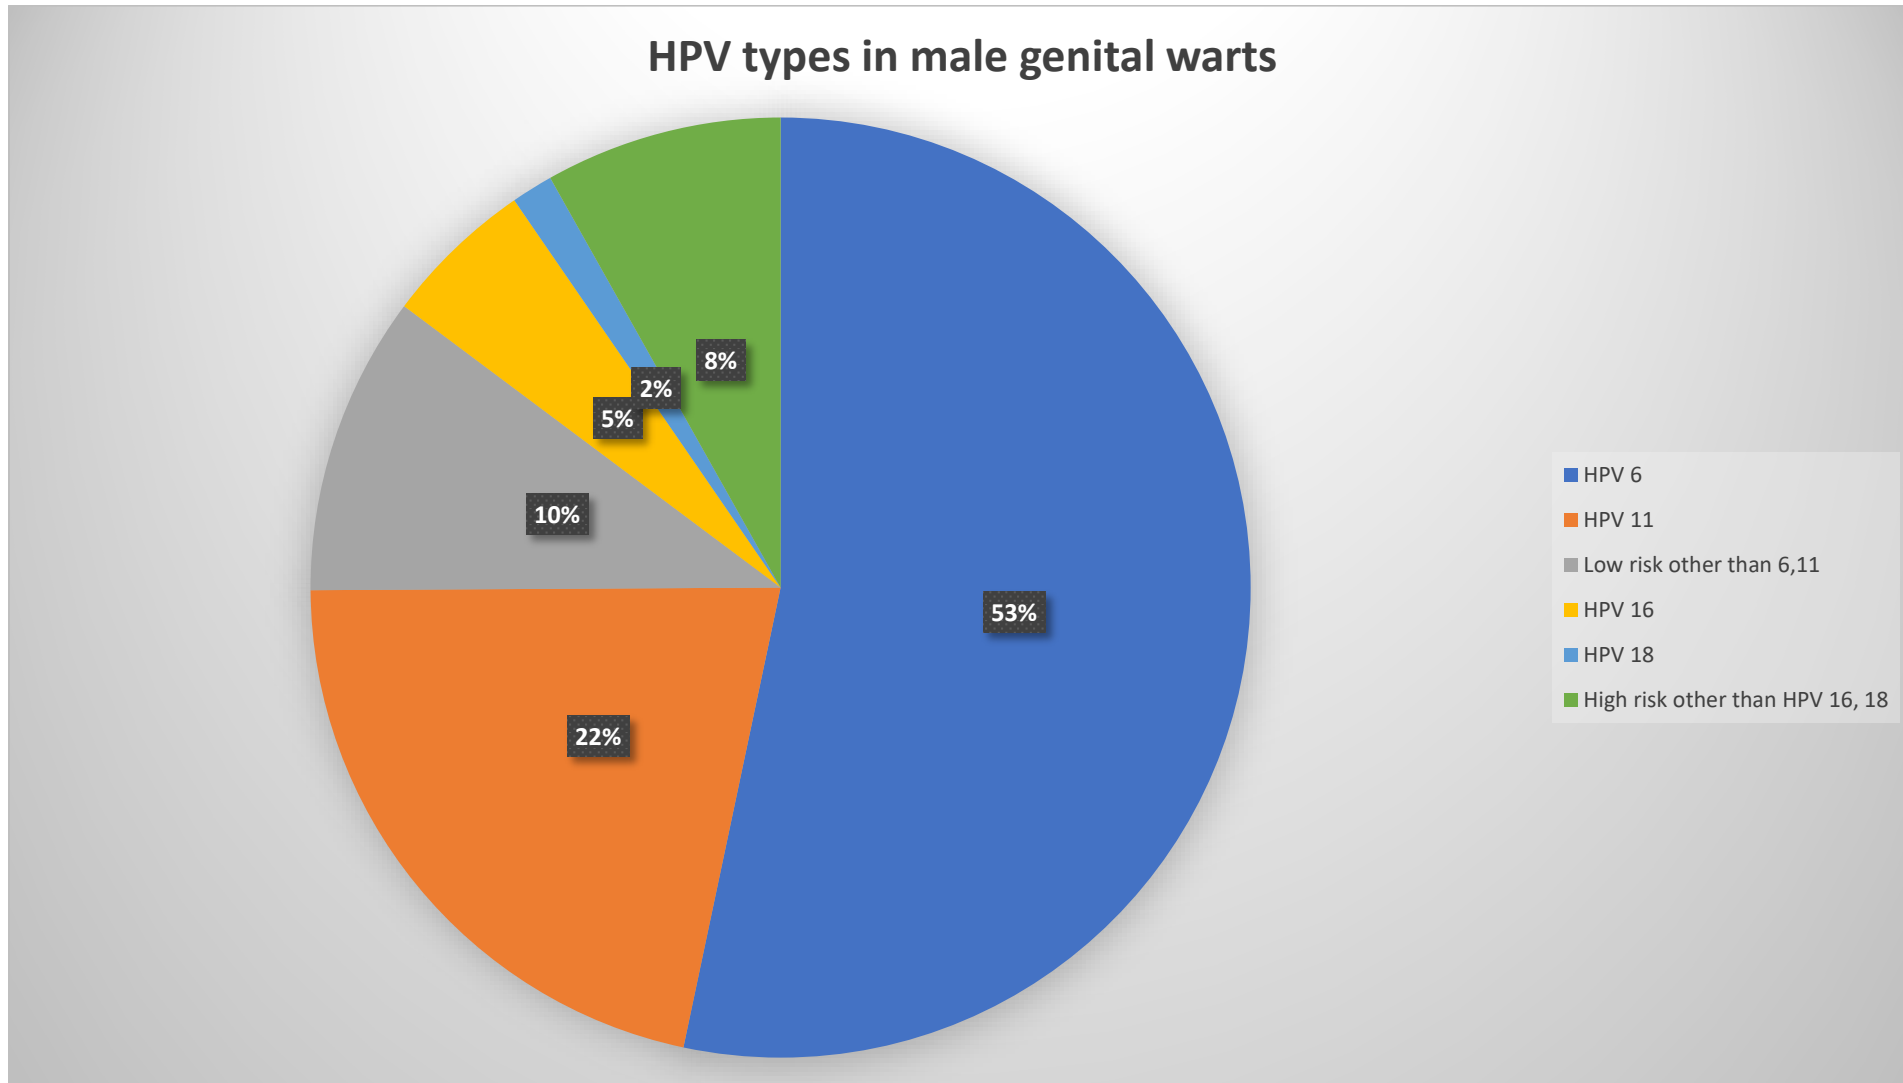

| <b>TYPE</b>                        | <b>SINGLE</b> | <b>MIXED</b> | <b>TOTAL</b> | <b>% OF POSITIVE WARTS</b> |
|------------------------------------|---------------|--------------|--------------|----------------------------|
| <b>HPV 6</b>                       | 471           | 124          | 595          | 59.5                       |
| <b>HPV 11</b>                      | 201           | 40           | 241          | 24.1                       |
| <b>LOW RISK OTHER THAN 6,11</b>    | 95            | 20           | 115          | 11.5                       |
| <b>HPV 16</b>                      | 25            | 33           | 58           | 5.8                        |
| <b>HPV 18</b>                      | 2             | 14           | 16           | 1.6                        |
| <b>HPV 31</b>                      | 0             | 2            | 2            | 0.2                        |
| <b>HPV 33</b>                      | 2             | 2            | 4            | 0.4                        |
| <b>HPV 45</b>                      | 3             | 2            | 5            | 0.5                        |
| <b>HPV 52</b>                      | 0             | 1            | 1            | 1                          |
| <b>HPV 58</b>                      | 1             | 2            | 3            | 0.3                        |
| <b>HIGH RISK OTHER THAN 16, 18</b> | 18            | 73           | 91           | 9.1                        |

## Figure 2. Genotypic distribution of 1,000 male genital warts as related with HPV6, HPV11, HPV16 and HPV18

- A. HPV6 single infection
- B. HPV11 single infection
- C. HPV16 single infection
- D. HPV 6 and 18 mixed infection

A.

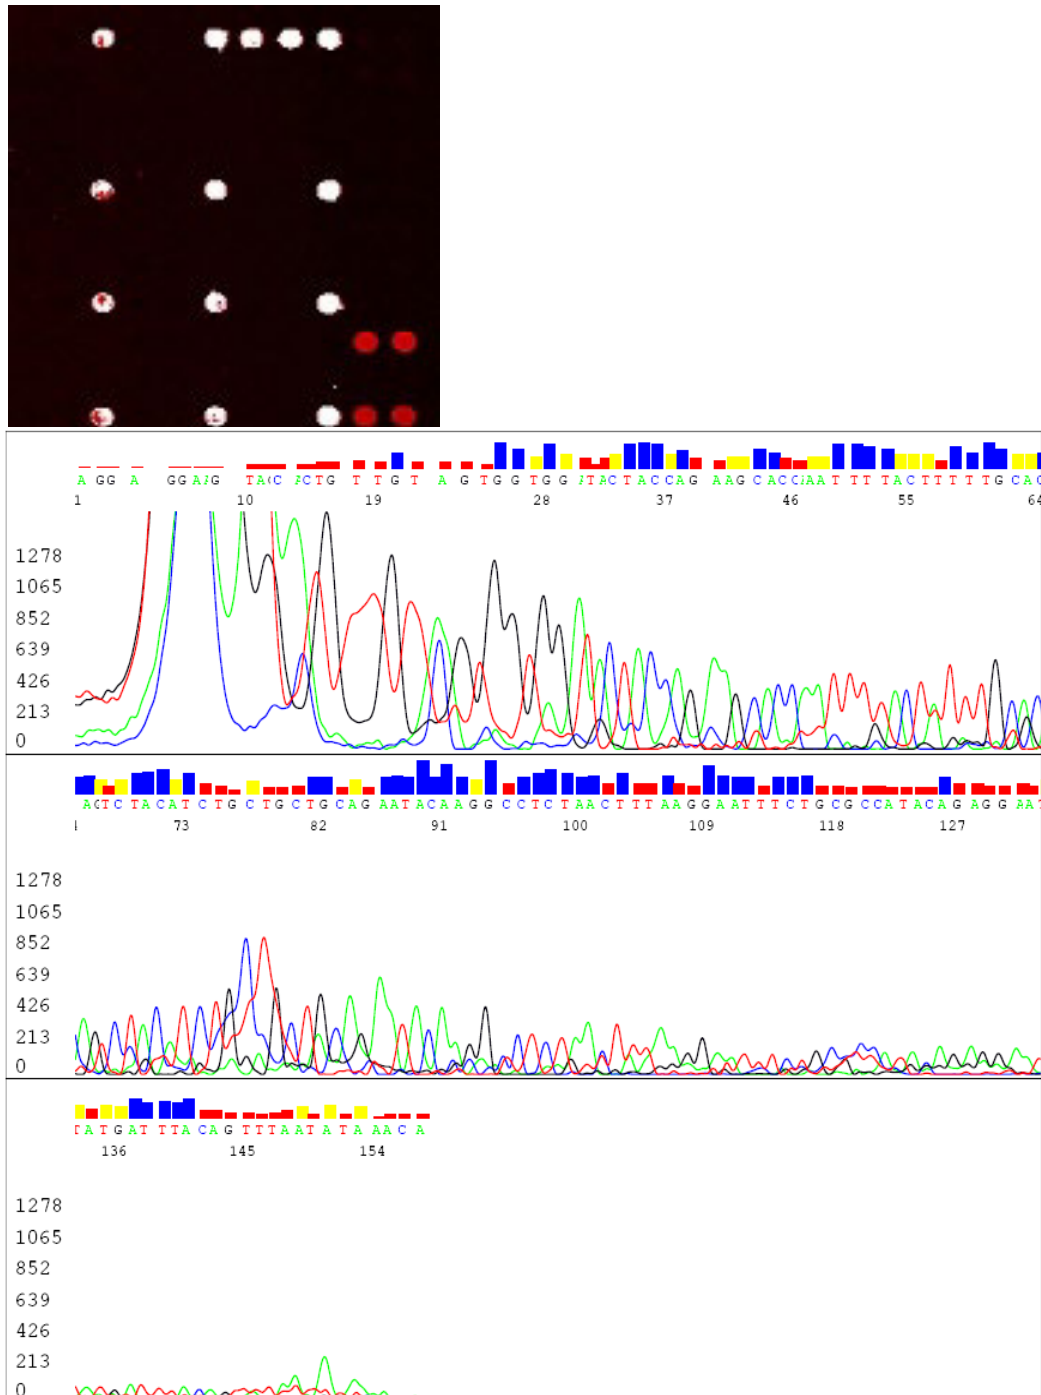

B.

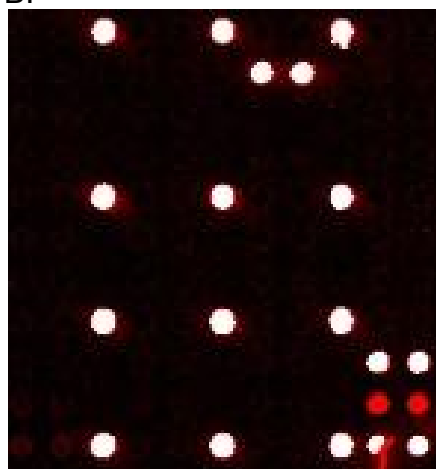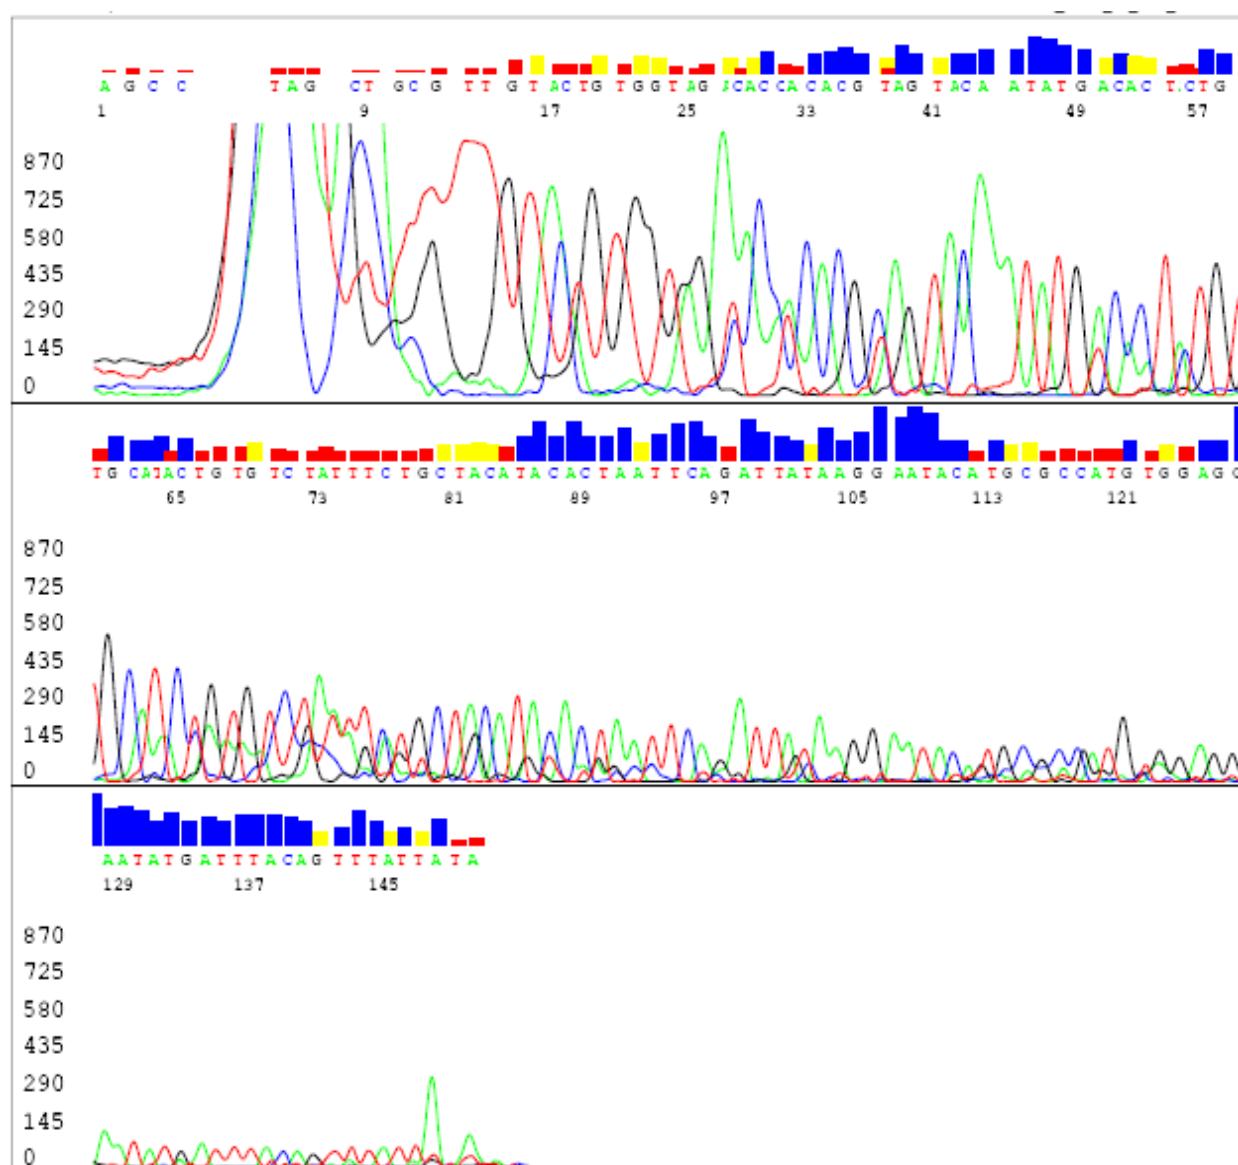

C.

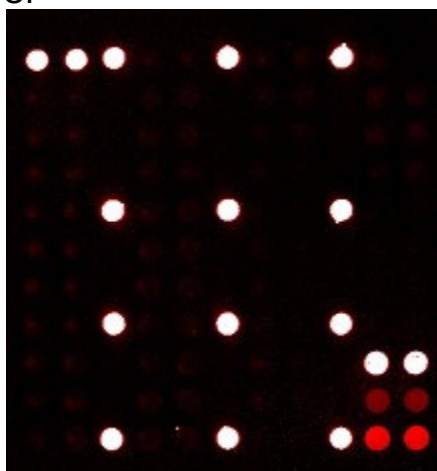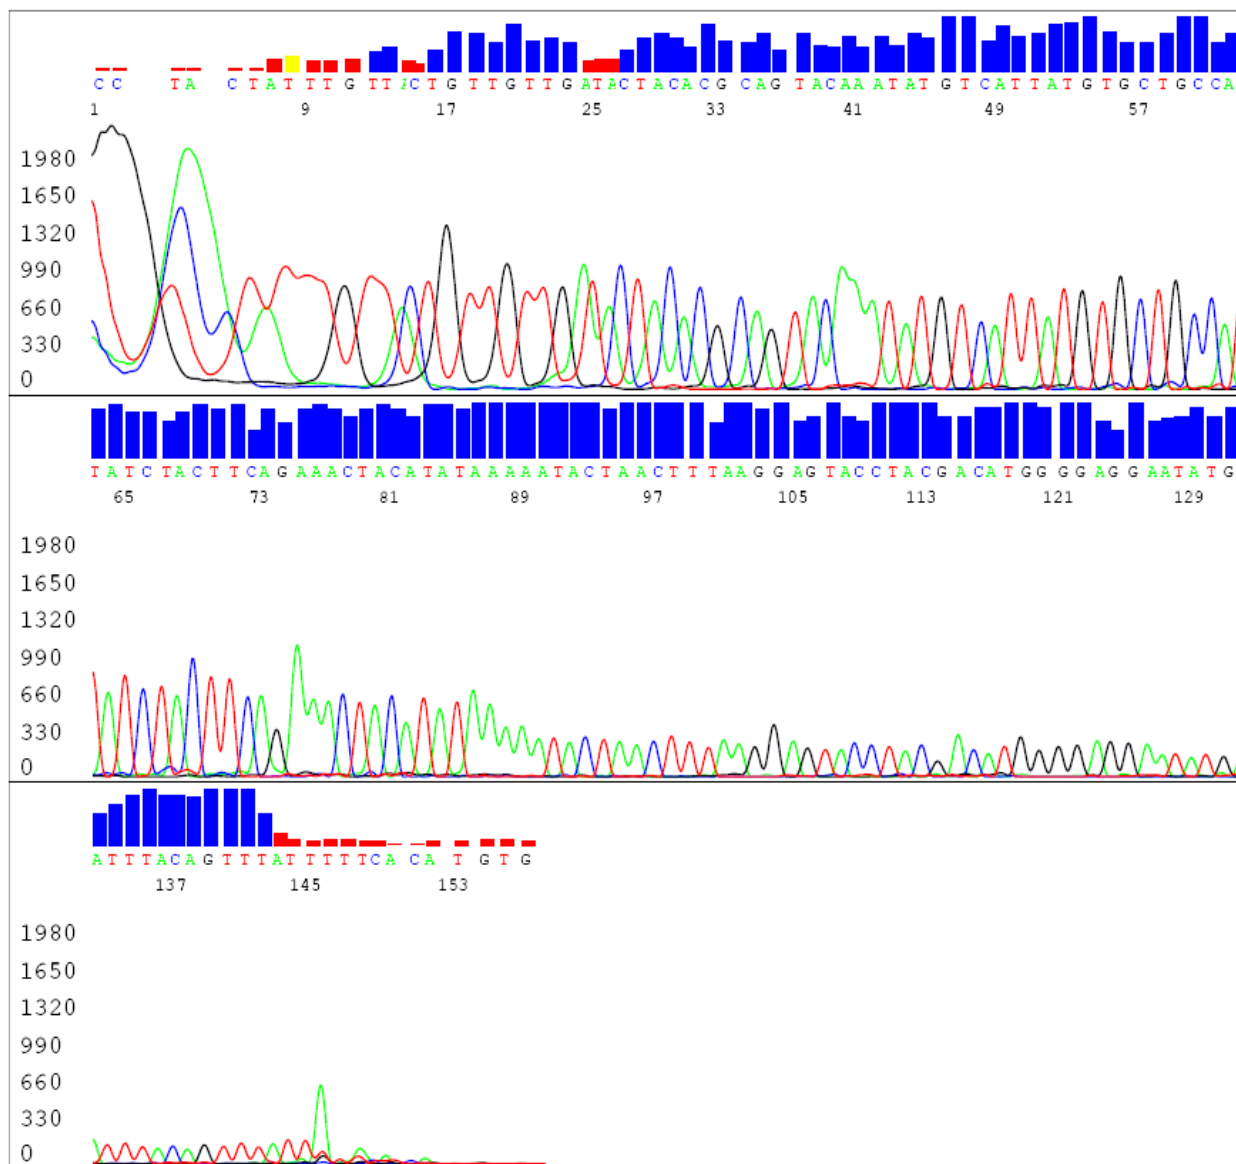



D.

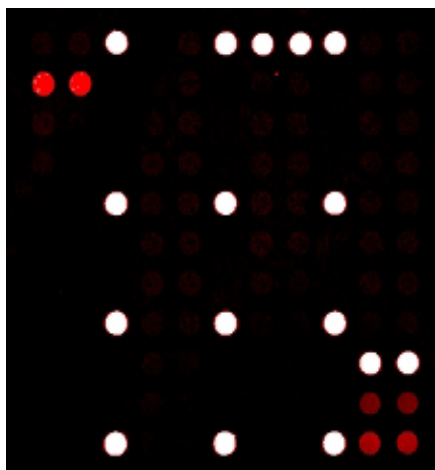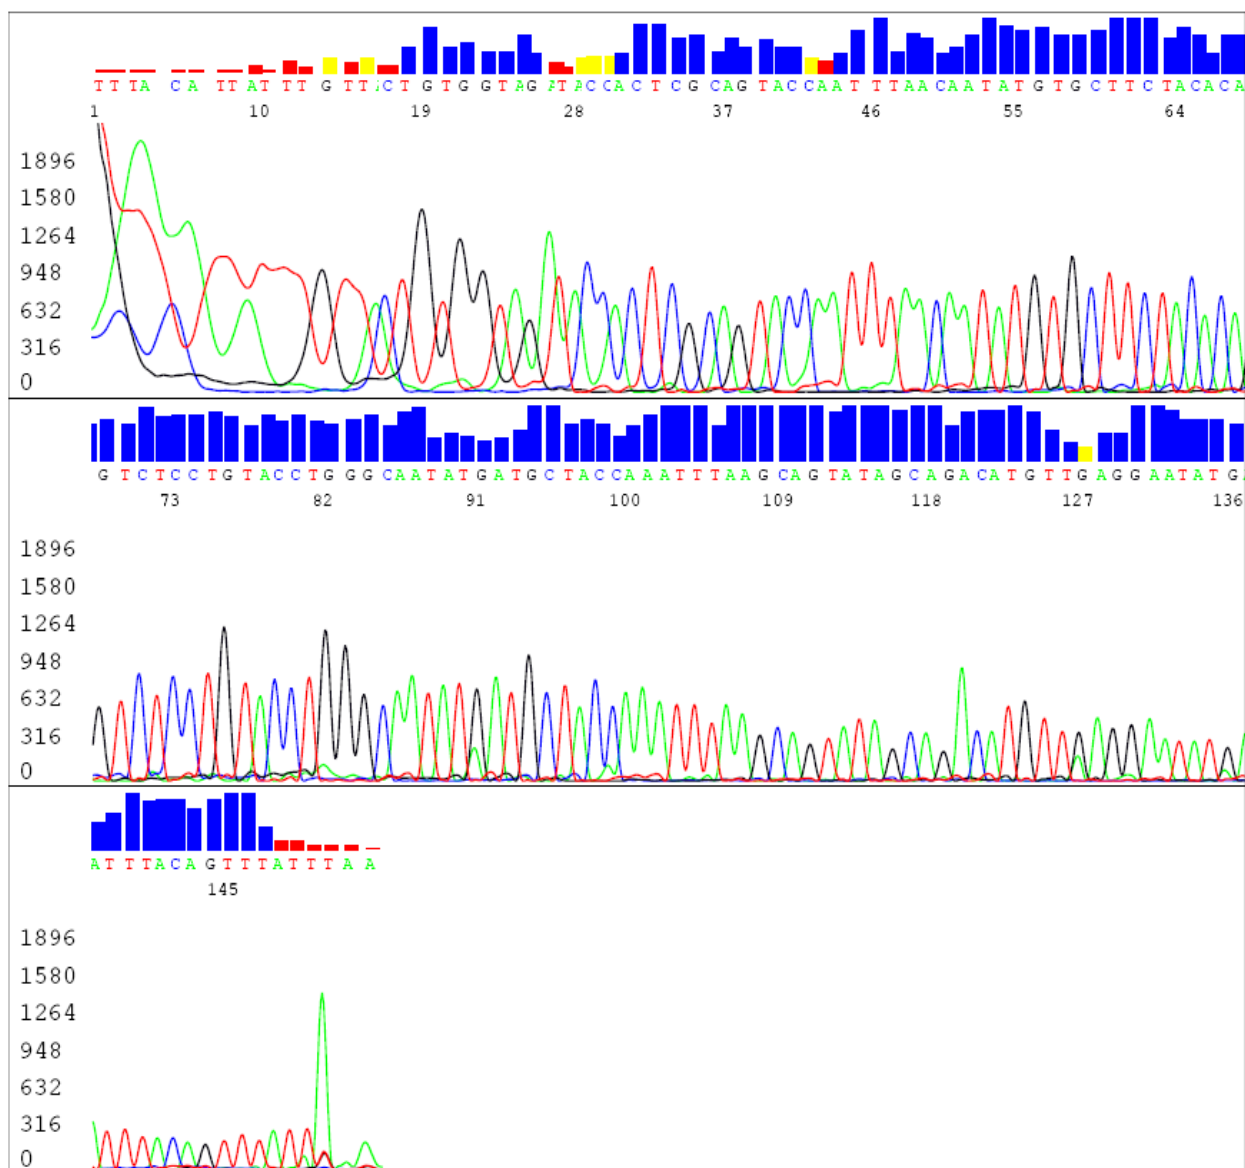

Source: https://www.biorxiv.org/content/10.1101/2021.07.19.453017v1.full.pdf
